# Supplementary material for: Bioactivity of Farnesyltransferase Inhibitors Against Entamoeba histolytica and Schistosoma mansoni
Source: Front Cell Infect Microbiol. 2019 May 29;9:180. doi: 10.3389/fcimb.2019.00180 (PMC6548881; doi:10.3389/fcimb.2019.00180)
Supplement: Supplementary Table 1 — Chemical structures and properties of analogs of tipifarnib and their activity against E. histolytica trophozoites. NA means compound was not available for testing. [file Table_1.XLS]

## Sheet: CDD Export 1
Molecule Name	Structure	Molecular weight (g/mol)	log P	log D	pKa	E. histolytica activity
CHN-13		505.02	5.07	4.72	7.5	A
JK-02		505.02	5.07	4.72	7.5
JK-17		503.43	5.04	4.7	7.49
JK-19		517.45	5.63	5.35	7.37
JK-31		489.4	4.69	4.34	7.5
HB-12		468.99	4.6	4.2	7.58
HB-15		522.96	4.96	4.61	7.5
HB-21		497.04	5.33	4.93	7.57
HB-24		531.06	5.73	5.38	7.5
HB-27		545.08	6.17	5.82	7.5
PN-133		504.565	4.53	4.52	5.95
HB-30		484.98	3.92	3.58	7.5
JK-12		505.02	5.07	4.72	7.5
JK-13		490.38	4.79	4.78	5.95
CHN-12		407.9	3.7	3.69	5.95
JK-21		546.49	6.83	6.82	5.95
PN-103		530.04	6.22	6.21	5.95
HB-19		498.02	5.43	5.42	5.95	B
HB-23		546.07	6.48	6.47	5.95
HB-18		483.01	5.04	4.65	7.57
HB-10		469.97	4.7	4.69	5.95
HB-11		484	5.35	5.33	5.95
HB-13		523.94	5.07	5.06	5.95
HB-16		484	5.15	5.14	5.95
HB-4		484	5.8	5.8	5.17
HB-44		421.93	3.85	3.84	5.99
JK-18		518.44	5.79	5.78	5.91
JK-23		504.41	5.15	5.14	5.91
LNK-764.1		478.98	4.23	3.88	7.5
PN-139		523.63	5.89	5.88	5.94
SM-1		498.02	5.86	5.85	5.95
CHN-10		392.89	2.95	2.59	7.51
CHN-23		455.94	4.19	4.18	5.95
HB-28		485.97	4.03	4.02	5.95
HB-8		523.94	5.52	5.52	5.18
HB-9		484	5.6	5.6	5.18
JK-03		504.41	5.31	5.3	5.95
PN-127		504.565	4.91	4.9	5.93
CHN-11		393.87	3.05	3.04	5.95
CHN-16		460.98	3.99	3.65	7.49
CHN-22		454.96	4.08	3.7	7.55
HB-7		469.97	5.16	5.16	5.18
CHN-15		520.03	5.82	5.81	5.95	C
HB-20		512.05	6.08	6.07	5.95
CHN-14		506	5.18	5.17	5.95
CHN-17		461.96	4.1	4.09	5.95
CHN-24		469.97	4.83	4.82	5.95
HB-14		537.97	5.71	5.7	5.95
HB-17		498.02	5.79	5.78	5.95
HB-22		532.04	5.84	5.82	5.95
HB-25		546.07	6.28	6.27	5.95
HB-26		560.09	6.92	6.91	5.95
HB-5		537.97	6.17	6.16	5.17
HB-6		498.02	6.25	6.25	5.17
JK-05		468.99	4.6	4.25	7.5
JK-11		518.44	5.95	5.94	5.95
JK-26		520.03	5.82	5.81	5.95
JK-33		484	5.35	5.33	5.95
JK-34		537.97	5.71	5.7	5.95
LNK-764.2		478.98	4.23	3.88	7.5
PN-040		471.508	4.51	4.5	5.95
PN-049		481.571	4.97	4.95	5.99
PN-055		493.538	4.53	4.52	5.95
PN-109		517.99	4.82	4.81	5.95
PN-147		484.96	6.12	6.12	2.84
PN-141		484.96	5.73	5.73	4.61
HB-2		522.96	5.42	5.29	6.93
PN-148		490.98	5.99	5.99	1.6
CHN-18		475.99	4.74	4.73	5.95
HB-29		500	4.67	4.66	5.95
HB-3		483.01	5.5	5.35	7.01
JK-15		522.96	4.96	4.61	7.49
JK-22		504.41	5.31	5.3	5.95
PN-114		485.94	5.03	5.03	1.04
PN-120		509.6	5.38	5.37	5.94
CHN-19		444.92	3.22	2.87	7.49
CHN-20		445.9	3.33	3.32	5.95
CHN-21		459.93	3.97	3.96	5.95
CHN-29		445.9	3.33	3.32	5.95
HB-31		471.94	3.89	3.87	5.95
HB-38		393.87	3.18	3.17	6.02
HB-46		445.9	3.25	3.24	5.93
JK-25		484	5.35	5.33	5.95	D
JK-35		505.95	5.12	5.11	5.95
PN-149		549.04	7.24	7.24	5.09
PN-077		493.538	4.45	4.44	5.93
HB-43		407.9	3.2	3.19	5.99
HB-1		468.99	5.05	4.91	7.01
JK-32		487.96	4.97	4.96	5.95
JK-37		498.02	5.86	5.85	5.95
PN-030		538.85	6.04	6.03	5.95
PN-046		483.543	4.15	4.14	5.97
PN-084		505.95	5.12	5.11	5.94
PN-091		517.99	4.82	4.81	5.95
SM-2		504.41	5.44	5.42	5.95
JK-14		504.41	5.44	5.42	5.95
JK-16		537.97	5.71	5.7	5.95
JK-27		469.97	4.83	4.82	5.95
PN-062		504.565	4.53	4.52	5.96
PN-070		483.543	4.21	4.2	5.95
PN-097		513.569	4.06	4.04	5.95
PN-150		520.39	5.93	5.93	-1.33
R115776		489.4	4.69	4.34	7.5
CHN-25		458.95	2.11	1.99	6.92
HB-41		473.96	3.31	3.3	5.99
JK-38		538.85	6.04	6.03	5.95
CHN-26		459.93	2.21	2.19	6.24
CHN-28		444.92	3.22	3.06	7.06
CHN-30		459.93	3.97	3.96	5.95
HB-32		485.97	4.53	4.51	5.95
HB-33		470.96	3.64	3.42	7.49
HB-34		456.93	2.97	2.96	5.97
HB-35		470.96	3.61	3.6	5.97
HB-36		455.95	2.86	2.52	7.49
HB-37		379.84	2.54	2.53	6.03
HB-39		378.86	2.43	1.76	7.97
HB-40		459.93	2.67	2.66	5.99
HB-42		458.95	2.56	2.52	6.48
HB-45		406.91	3.1	2.17	8.27
JK-07		455.94	4.84	4.83	5.95
R115777		489.4	4.69	4.34	7.5
CHN-27		473.96	2.86	2.84	6.23
JK-24		517.45	5.48	5.2	7.36	NA
JK-08		469.97	4.7	4.69	5.95	NA
JK-20		532.47	6.31	6.3	5.95	NA
